# Supplementary material for: Risk Factors for SARS-CoV-2 Infection Among US Healthcare Personnel, May–December 2020
Source: PubMed Central journal article supplement (PMC8714235; doi:10.3201/eid2801.211803), 2022-01
Supplement: 21-1803-Techapp-s1.pdf [file 21-1803-Techapp-s1.pdf]

# Risk Factors for SARS-CoV-2 Infection Among US Healthcare Personnel, May–December 2020

## Appendix

**Appendix Table 1.** Characteristics of healthcare personnel with (cases) and without (controls) SARS-CoV-2 infection, 5 US Emerging Infections Program sites, May–December 2020\*

| Characteristic                                                                                                                                               | Cases (n = 345) | Controls (n = 622) |
|--------------------------------------------------------------------------------------------------------------------------------------------------------------|-----------------|--------------------|
| Site, no. (%)                                                                                                                                                |                 |                    |
| Colorado                                                                                                                                                     | 89 (25.8)       | 165 (26.5)         |
| Minnesota                                                                                                                                                    | 51 (14.8)       | 86 (13.8)          |
| New Mexico                                                                                                                                                   | 57 (16.5)       | 101 (16.2)         |
| New York                                                                                                                                                     | 52 (15.1)       | 98 (15.8)          |
| Oregon                                                                                                                                                       | 96 (27.8)       | 172 (27.7)         |
| Facility type, no. (%)                                                                                                                                       |                 |                    |
| Hospital                                                                                                                                                     | 269 (78.0)      | 432 (69.5)         |
| Nursing home                                                                                                                                                 | 17 (4.9)        | 37 (5.9)           |
| Other facility type†                                                                                                                                         | 59 (17.1)       | 151 (24.3)         |
| Not reported                                                                                                                                                 | –               | 2 (0.3)            |
| Days from SARS-CoV-2 antigen test specimen collection date to interview, median (IQR)                                                                        | 8 (6–12)        | 16 (10–26)         |
| Days from COVID-19 symptom onset to SARS-CoV-2 antigen test specimen collection, median (IQR)‡                                                               | 2 (1–4)         | 2 (1–4)            |
| Age, y, median (IQR)                                                                                                                                         | 35 (28–47)      | 37 (30–47)         |
| Age group, y, no. (%)                                                                                                                                        |                 |                    |
| <30                                                                                                                                                          | 107 (31.0)      | 143 (23.0)         |
| ≥30                                                                                                                                                          | 238 (69.0)      | 473 (76.1)         |
| Not reported                                                                                                                                                 | –               | 6 (0.9)            |
| Sex, no. (%)                                                                                                                                                 |                 |                    |
| F                                                                                                                                                            | 268 (77.7)      | 473 (76.0)         |
| M                                                                                                                                                            | 77 (22.3)       | 142 (22.8)         |
| Other or not reported                                                                                                                                        | –               | 7 (1.1)            |
| Race and ethnicity, no. (%)                                                                                                                                  |                 |                    |
| White, non-Hispanic                                                                                                                                          | 194 (56.2)      | 406 (65.3)         |
| Hispanic or Latino, any race or races                                                                                                                        | 86 (24.9)       | 106 (17.0)         |
| Black, non-Hispanic                                                                                                                                          | 25 (7.2)        | 28 (4.5)           |
| Asian, non-Hispanic                                                                                                                                          | 17 (4.9)        | 29 (4.7)           |
| Other or multiple races, non-Hispanic or race or ethnicity not reported                                                                                      | 23 (6.8)        | 53 (8.5)           |
| Healthcare role, no. (%)                                                                                                                                     |                 |                    |
| Registered nurse                                                                                                                                             | 96 (27.8)       | 201 (32.3)         |
| Administrative personnel                                                                                                                                     | 47 (13.6)       | 50 (8.0)           |
| Physician                                                                                                                                                    | 20 (5.8)        | 63 (10.1)          |
| Nursing assistant or patient care technician                                                                                                                 | 24 (7.0)        | 36 (5.8)           |
| Medical assistant                                                                                                                                            | 16 (4.6)        | 23 (3.7)           |
| Other role anticipated to have substantial patient contact§                                                                                                  | 58 (16.8)       | 107 (17.2)         |
| Other role anticipated to have moderate patient contact¶                                                                                                     | 51 (14.8)       | 77 (12.4)          |
| Other role anticipated to have minimal patient contact#                                                                                                      | 24 (7.0)        | 36 (5.8)           |
| Other role with undefined level of patient contact                                                                                                           | 9 (2.6)         | 29 (4.7)           |
| ≥1 underlying medical condition, no. (%)**                                                                                                                   | 233 (67.5)      | 400 (64.3)         |
| ≥1 symptom in the 14 d before or on SARS-CoV-2 antigen test specimen collection, no. (%)††                                                                   | 331 (95.9)      | 390 (62.7)         |
| Close contact with patients with COVID-19 in the workplace in the 14 d before illness onset or SARS-CoV-2 antigen test specimen collection date, no. (%)     |                 |                    |
| Yes                                                                                                                                                          | 113 (32.8)      | 197 (31.7)         |
| No                                                                                                                                                           | 217 (62.9)      | 397 (63.8)         |
| Unknown or not reported                                                                                                                                      | 15 (4.3)        | 28 (4.5)           |
| Close contact with persons with COVID-19 outside the workplace in the 14 d before illness onset or SARS-CoV-2 antigen test specimen collection date, no. (%) | 127 (36.8)      | 62 (10.0)          |

| Characteristic                                                                   | Cases (n = 345) | Controls (n = 622) |
|----------------------------------------------------------------------------------|-----------------|--------------------|
| Yes—family member                                                                | 83 (24.1)       | 39 (6.3)           |
| Spouse or partner                                                                | 40 (11.6)       | 16 (2.6)           |
| Child                                                                            | 9 (2.6)         | 10 (1.6)           |
| Parent                                                                           | 16 (4.6)        | 4 (0.6)            |
| Other family member                                                              | 23 (6.7)        | 11 (1.8)           |
| Yes—someone else (not a family member) with COVID-19                             | 47 (13.6)       | 23 (3.7)           |
| No                                                                               | 203 (58.8)      | 545 (87.6)         |
| Unknown or not reported                                                          | 15 (4.3)        | 15 (2.5)           |
| Travel, no. (%)                                                                  |                 |                    |
| Yes                                                                              | 78 (22.6)       | 148 (23.8)         |
| International                                                                    | 5 (1.4)         | 1 (0.2)            |
| Domestic                                                                         | 73 (21.2)       | 147 (23.6)         |
| No                                                                               | 265 (76.8)      | 472 (75.9)         |
| Unknown or not reported                                                          | 2 (0.6)         | 2 (0.3)            |
| Attended a gathering that included persons other than household members, no. (%) |                 |                    |
| Yes                                                                              | 90 (26.1)       | 158 (25.4)         |
| No                                                                               | 255 (73.9)      | 461 (74.1)         |
| Unknown or not reported                                                          | 0 (0)           | 3 (0.5)            |
| Used public transportation, no. (%)                                              |                 |                    |
| Yes                                                                              | 31 (9.0)        | 62 (10.0)          |
| No                                                                               | 314 (91.0)      | 559 (89.9)         |
| Unknown or not reported                                                          | 0 (0)           | 1 (0.2)            |
| Used ride share service, no. (%)                                                 |                 |                    |
| Yes                                                                              | 29 (8.4)        | 40 (6.4)           |
| No                                                                               | 313 (90.7)      | 580 (93.2)         |
| Unknown or not reported                                                          | 3 (0.9)         | 2 (0.4)            |
| Practiced physical distancing with co-workers in the workplace, no. (%)          |                 |                    |
| Always                                                                           | 83 (24.1)       | 89 (14.3)          |
| Most of the time                                                                 | 136 (39.4)      | 232 (37.3)         |
| Some of the time                                                                 | 63 (18.3)       | 157 (25.2)         |
| Never                                                                            | 62 (18.0)       | 140 (22.5)         |
| Not reported                                                                     | 1 (0.3)         | 4 (0.6)            |
| Practiced universal mask wearing in the workplace, no. (%)                       |                 |                    |
| Always                                                                           | 290 (84.1)      | 517 (83.1)         |
| Most of the time                                                                 | 44 (12.8)       | 86 (13.8)          |
| Some of the time                                                                 | 3 (0.9)         | 9 (1.4)            |
| Never                                                                            | 7 (2.0)         | 6 (1.0)            |
| Not reported                                                                     | 1 (0.3)         | 4 (0.6)            |

\*COVID-19, coronavirus disease; IQR, interquartile range; SARS-CoV-2, severe acute respiratory syndrome coronavirus 2.

†Includes outpatient clinics, urgent care clinics, free-standing emergency rooms or departments, and mental health facilities.

‡Of 345 cases, 305 were symptomatic with onset date before positive test specimen collection date and included in the calculations; of 622 controls, 382 were symptomatic with onset date before negative test specimen collection date and included in the calculations. Symptoms include fever, chills, dry or productive cough, fatigue or malaise, sore throat, runny nose, shortness of breath, muscle aches, headache, chest pain or tightness, nausea or vomiting, diarrhea, abdominal pain, altered sense of smell or taste, congestion, loss of appetite.

§Includes dental healthcare provider, emergency medical services personnel, licensed practical nurse, nurse practitioner, occupational therapist, other nurse, physician assistant, physical therapist or assistant, phlebotomist, respiratory therapist, radiology technician, speech-language pathologist, and surgical, medical, or emergency technician.

¶Includes nonphysician behavioral health provider, chaplain, care coordinator, dietician, environmental services personnel, food services personnel, patient transport personnel, research personnel, social worker, or student.

#Includes facilities maintenance personnel, medical equipment technician, laboratory personnel, or pharmacist. Detailed healthcare roles and area of the facility in which healthcare personnel worked are available in Appendix Tables 2 and 3 (<https://wwwnc.cdc.gov/EID/article/28/1/21-1803-App1.pdf>).

\*\*Includes asthma, rhinitis, chronic obstructive pulmonary disease or other chronic lung diseases, hypertension or heart conditions, diabetes mellitus, chronic kidney disease or hemodialysis, autoimmune or rheumatologic disease, active cancer, solid organ or hematopoietic stem cell transplant, other immunosuppressing conditions, chronic liver disease, pregnancy, current or recent smoking (i.e., within a year of SARS-CoV-2 antigen test specimen collection), and obesity or severe obesity with body mass index  $\geq 30$ . Detailed underlying medical conditions are available in Appendix Table 4.

††Includes fever, chills, dry or productive cough, fatigue or malaise, sore throat, runny nose, shortness of breath, muscle aches, headache, chest pain or tightness, nausea or vomiting, diarrhea, abdominal pain, altered sense of smell or taste, congestion, loss of appetite.

**Appendix Table 2.** Roles of healthcare personnel cases and controls, May–December 2020

| Healthcare role, no. (%)                     | Cases<br>(N=345) | Controls<br>(N=622) |
|----------------------------------------------|------------------|---------------------|
| Registered nurse                             | 96 (27.8)        | 201 (32.3)          |
| Administrative personnel                     | 47 (13.6)        | 50 (8.0)            |
| Physician                                    | 20 (5.8)         | 63 (10.1)           |
| Nursing assistant or patient care technician | 24 (7.0)         | 36 (5.8)            |
| Medical assistant                            | 16 (4.6)         | 23 (3.7)            |
| Food services staff                          | 17 (4.9)         | 18 (2.9)            |
| Pharmacy personnel                           | 5 (1.4)          | 20 (3.2)            |
| Surgical or medical technician               | 9 (2.6)          | 12 (1.9)            |
| Mental health personnel                      | 4 (1.2)          | 16 (2.6)            |
| Environmental services staff                 | 13 (3.8)         | 7 (1.1)             |
| Nurse practitioner                           | 4 (1.2)          | 16 (2.6)            |
| Radiology personnel                          | 10 (2.9)         | 10 (1.6)            |
| Physical therapy personnel                   | 7 (2.0)          | 12 (1.9)            |
| Laboratory personnel                         | 8 (2.3)          | 9 (1.4)             |
| Physician assistant                          | 3 (0.9)          | 13 (2.1)            |
| Social worker                                | 3 (0.9)          | 12 (1.9)            |
| Phlebotomist                                 | 3 (0.9)          | 11 (1.8)            |
| Research personnel                           | 6 (1.7)          | 8 (1.3)             |
| Emergency medical service personnel          | 5 (1.4)          | 7 (1.1)             |
| Facility personnel                           | 6 (1.7)          | 5 (0.8)             |
| Licensed practical nurse                     | 3 (0.9)          | 8 (1.3)             |
| Occupational therapy personnel               | 7 (2.0)          | 4 (0.6)             |
| Respiratory therapist                        | 4 (1.2)          | 7 (1.1)             |
| Transport personnel                          | 4 (1.2)          | 4 (0.6)             |
| Medical equipment technician                 | 5 (1.4)          | 2 (0.3)             |
| Care manager or coordinator                  | 3 (0.9)          | 3 (0.5)             |
| Speech language pathologist                  | 1 (0.3)          | 5 (0.8)             |
| Nutritionist or nutrition assistant          | 1 (0.3)          | 4 (0.6)             |
| Student                                      | 0 (0)            | 4 (0.6)             |
| Nurse, other                                 | 2 (0.6)          | 1 (0.2)             |
| Chaplain                                     | 0 (0)            | 1 (0.2)             |
| Dental personnel                             | 0 (0)            | 1 (0.2)             |
| Other                                        | 9 (2.6)          | 28 (4.5)            |
| Not reported                                 | 0 (0)            | 1 (0.2)             |

**Appendix Table 3.** Area of the healthcare facility in which healthcare personnel (HCP) worked, May–December 2020

| Area of the facility in which the HCP worked, no. (%) | Case-HCP<br>(N=345) | Control-HCP<br>(N=622) |
|-------------------------------------------------------|---------------------|------------------------|
| Inpatient ward                                        | 128 (37.1)          | 252 (40.5)             |
| Outpatient clinic                                     | 70 (20.3)           | 170 (27.3)             |
| Intensive care unit                                   | 60 (17.4)           | 118 (19.0)             |
| Emergency department                                  | 64 (18.6)           | 105 (16.9)             |
| Administrative offices                                | 45 (13.0)           | 72 (11.6)              |
| Reception area                                        | 30 (8.7)            | 51 (8.2)               |
| Operating room                                        | 24 (7.0)            | 54 (8.7)               |
| Nursing home ward                                     | 17 (4.9)            | 35 (5.6)               |
| Radiology department                                  | 20 (5.8)            | 31 (5.0)               |
| Laboratory                                            | 18 (5.2)            | 28 (4.5)               |
| Dining room or cafeteria                              | 17 (4.9)            | 20 (3.2)               |
| Kitchen                                               | 15 (4.3)            | 14 (2.3)               |
| Pharmacy                                              | 3 (0.9)             | 22 (3.5)               |
| Home health or private residence                      | 2 (0.6)             | 7 (1.1)                |
| Endoscopy area                                        | 4 (1.2)             | 4 (0.6)                |
| Other area                                            | 53 (15.4)           | 77 (12.4)              |

**Appendix Table 4.** Underlying medical condition of healthcare personnel, May–December 2020

| Underlying medical conditions, no. (%) | Case-HCP<br>(N=345) | Control-HCP<br>(N=622) |
|----------------------------------------|---------------------|------------------------|
| Obesity or severe obesity              | 109 (31.6)          | 141 (22.7)             |
| Hypertension                           | 34 (9.9)            | 64 (10.3)              |
| Asthma                                 | 53 (15.4)           | 98 (15.8)              |
| Diabetes mellitus                      | 13 (3.8)            | 20 (3.2)               |
| Current or recent smoker               | 17 (4.9)            | 39 (6.3)               |
| Autoimmune or rheumatologic disease    | 26 (7.5)            | 45 (7.2)               |
| Heart condition                        | 8 (2.3)             | 23 (3.7)               |
| Pregnancy                              | 6 (1.7)             | 14 (2.3)               |
| Cancer                                 | 2 (0.6)             | 4 (0.6)                |
| Chronic obstructive pulmonary disease  | 1 (0.3)             | 3 (0.5)                |
| Chronic kidney disease                 | --                  | 4 (0.6)                |
| Other immunosuppression*               | 10 (2.9)            | 14 (2.3)               |

\*Includes history of solid organ or hematopoietic stem cell transplantation, asplenia, and receipt of immunosuppressing medications.

**Appendix Table 5.** Characteristics of 310 US healthcare personnel who had close contact with COVID-19 patients in the workplace, May–December 2020\*

| Characteristic                                                                                       | Cases<br>(n = 113) | Controls<br>(n = 197) |
|------------------------------------------------------------------------------------------------------|--------------------|-----------------------|
| Activities performed by healthcare personnel in the workplace with COVID-19 patients, no. (%)        |                    |                       |
| Nonprocedure clinical care†                                                                          | 91 (80.5)          | 151 (76.6)            |
| Assistance with activities of daily living‡                                                          | 79 (69.9)          | 107 (54.3)            |
| Procedures§                                                                                          | 52 (46.0)          | 100 (50.8)            |
| Respiratory care activities¶                                                                         | 58 (51.3)          | 92 (46.7)             |
| Environmental activities#                                                                            | 56 (49.6)          | 82 (41.6)             |
| Administrative activities**                                                                          | 12 (10.6)          | 24 (12.2)             |
| Personal protective equipment used by healthcare personnel during care of COVID-19 patients, no. (%) |                    |                       |
| Gloves                                                                                               |                    |                       |
| All of the time                                                                                      | 102 (90.3)         | 161 (81.7)            |
| Most of the time                                                                                     | 4 (3.5)            | 12 (6.1)              |
| Some of the time                                                                                     | 0                  | 10 (5.1)              |
| Never                                                                                                | 6 (5.3)            | 13 (6.6)              |
| Not reported                                                                                         | 1 (0.9)            | 1 (0.5)               |
| Gown                                                                                                 |                    |                       |
| All of the time                                                                                      | 79 (69.9)          | 107 (54.3)            |
| Most of the time                                                                                     | 6 (5.3)            | 18 (9.1)              |
| Some of the time                                                                                     | 10 (8.8)           | 20 (10.2)             |
| Never                                                                                                | 16 (14.2)          | 51 (25.9)             |
| Not reported                                                                                         | 2 (1.8)            | 1 (0.5)               |
| N95 respirator                                                                                       |                    |                       |
| All of the time                                                                                      | 48 (42.5)          | 82 (41.6)             |
| Most of the time                                                                                     | 5 (4.4)            | 13 (6.6)              |
| Some of the time                                                                                     | 12 (10.6)          | 22 (11.2)             |
| Never                                                                                                | 47 (41.6)          | 76 (38.6)             |
| Not reported                                                                                         | 1 (0.9)            | 4 (2.0)               |
| Powered air purifying respirator                                                                     |                    |                       |
| All of the time                                                                                      | 2 (1.8)            | 5 (2.5)               |
| Most of the time                                                                                     | 2 (1.8)            | 3 (1.5)               |
| Some of the time                                                                                     | 0                  | 7 (3.6)               |
| Never                                                                                                | 107 (94.7)         | 175 (88.8)            |
| Not reported                                                                                         | 2 (1.8)            | 7 (3.6)               |
| Facemask                                                                                             |                    |                       |
| All of the time                                                                                      | 77 (68.1)          | 120 (60.9)            |
| Most of the time                                                                                     | 2 (1.8)            | 11 (5.6)              |
| Some of the time                                                                                     | 5 (4.4)            | 17 (8.6)              |
| Never                                                                                                | 29 (25.7)          | 46 (23.4)             |
| Not reported                                                                                         | 0                  | 3 (1.5)               |
| Goggles or face shield                                                                               |                    |                       |
| All of the time                                                                                      | 80 (70.8)          | 128 (65.0)            |
| Most of the time                                                                                     | 6 (5.3)            | 15 (7.6)              |
| Some of the time                                                                                     | 5 (4.4)            | 21 (10.7)             |
| Never                                                                                                | 21 (18.6)          | 31 (15.7)             |
| Not reported                                                                                         | 1 (0.9)            | 2 (1.0)               |
| All recommended personal protective equipment††                                                      |                    |                       |
| All of the time                                                                                      | 39 (34.5)          | 62 (31.5)             |
| Not all of the time or not reported                                                                  | 74 (65.5)          | 135 (68.5)            |

| Characteristic                                                                                                              | Cases<br>(n = 113) | Controls<br>(n = 197) |
|-----------------------------------------------------------------------------------------------------------------------------|--------------------|-----------------------|
| Participation in aerosol-generating procedures, no. (%)                                                                     |                    |                       |
| Yes                                                                                                                         | 35 (31.0)          | 53 (26.9)             |
| High-flow oxygen delivery                                                                                                   | 22 (19.5)          | 32 (16.2)             |
| Airway suctioning                                                                                                           | 19 (16.8)          | 30 (15.2)             |
| Intubation or cardiopulmonary resuscitation                                                                                 | 14 (12.4)          | 31 (15.7)             |
| Noninvasive positive pressure ventilation                                                                                   | 15 (13.3)          | 23 (11.7)             |
| Nebulizer treatment                                                                                                         | 16 (14.2)          | 19 (9.6)              |
| Manual (bag) ventilation                                                                                                    | 11 (9.7)           | 16 (8.1)              |
| Breaking ventilation circuit                                                                                                | 10 (8.8)           | 15 (7.6)              |
| Chest physiotherapy                                                                                                         | 5 (4.4)            | 1 (0.5)               |
| Mini bronchoalveolar lavage                                                                                                 | 2 (1.8)            | 3 (1.5)               |
| Sputum induction                                                                                                            | 3 (2.7)            | 1 (0.5)               |
| High frequency oscillatory ventilation                                                                                      | 2 (1.8)            | 1 (0.5)               |
| Bronchoscopy                                                                                                                | 2 (1.8)            | 1 (0.5)               |
| No or unknown††                                                                                                             | 78 (69.0)          | 145 (73.6)            |
| Participation in aerosol-generating procedures, wearing all recommended personal protective equipment all the time, no. (%) | 21 (18.4)          | 36 (18.6)             |
| High-flow oxygen delivery§§                                                                                                 | 14/22 (63.6)       | 23/32 (71.9)          |
| Airway suctioning§§                                                                                                         | 14/19 (73.7)       | 22/30 (73.3)          |
| Intubation, extubation, or cardiopulmonary resuscitation§§                                                                  | 10/14 (71.4)       | 21/31 (67.7)          |
| Noninvasive positive pressure ventilation§§                                                                                 | 7/15 (46.7)        | 16/23 (69.6)          |
| Nebulizer treatment§§                                                                                                       | 7/16 (43.8)        | 15/19 (78.9)          |
| Manual (bag) ventilation§§                                                                                                  | 4/11 (36.4)        | 12/16 (75.0)          |
| Breaking ventilation circuit§§                                                                                              | 8/10 (80.0)        | 11/15 (73.3)          |
| Chest physiotherapy§§                                                                                                       | 4/5 (80.0)         | 0/1 (0)               |
| Mini bronchoalveolar lavage§§                                                                                               | 2/2 (100)          | 3/3 (100)             |
| Sputum induction§§                                                                                                          | 2/3 (66.7)         | 0/1 (0)               |
| High frequency oscillatory ventilation§§                                                                                    | 2/2 (100)          | 1/1 (100)             |
| Bronchoscopy§§                                                                                                              | 2/2 (100)          | 1/1 (100)             |

\*COVID-19, coronavirus disease.

†Includes physical examination, performing electrocardiograms or radiology tests, physical therapy, and providing medications.

‡Assistance with activities of daily living includes bathing, toileting, assisting with mobility, feeding, and participating in restraining patients.

§Include surgery, phlebotomy, suturing, wound care, endoscopy, and inserting or manipulating tubes, lines, or drains.

¶Respiratory care activities were considered separately from aerosol-generating procedures and include collecting respiratory specimens, manipulation of oxygen face mask, ventilator or tubing, tracheostomy care, and assisting with breathing exercises or speech and swallowing.

#Include cleaning patient rooms, changing linens, and performing room or equipment maintenance.

\*\*Include interviews or verbal assessments, scheduling, registration, teaching, and delivering personal care items or food to the patient.

††Defined as reporting always wearing an N95 respirator or always wearing a PAPR, always wearing goggles or a face shield, always wearing a gown, and always wearing gloves when caring for patients with COVID-19.

‡‡Four controls reported unknown participation in aerosol-generating procedures.

§§ No. HCP who participated and wore all recommended PPE during the procedure/no. HCP who participated in the procedure.
